# Supplementary material for: Diversity and Adaptation of Human Respiratory Syncytial Virus Genotypes Circulating in Two Distinct Communities: Public Hospital and Day Care Center
Source: Viruses. 2012 Oct 24;4(11):2432–47. doi: 10.3390/v4112432 (PMC3509657; doi:10.3390/v4112432)
Supplement: Supplementary File 1: — PDF-Document (PDF, 340 KB) [file viruses-04-02432-s001.pdf]

## Diversity and Adaptation of Human Respiratory Syncytial Virus Genotypes Circulating in Two Distinct Communities: Public Hospital and Day Care Center

Luiz Gustavo Araujo Gardinassi<sup>3\*</sup>, Paulo Vitor Marques Simas<sup>1\*</sup>, Deriane Elias Gomes<sup>2</sup>, Felipe Cavassan Nogueira<sup>1</sup>, Caroline Measso do Bonfim<sup>1</sup>, Gustavo Rocha Garcia<sup>3</sup> Claudia Márcia Aparecida Carareto<sup>1</sup>, Paula Rahal<sup>1</sup>, Fátima Pereira de Souza<sup>2\*\*</sup>.

Supplementary Table 1 – HRSVA and HRSB Reference Strains used on multiple alignments and phylogenetic analysis derived from GenBank.

| Antigenic Group (A or B) | Strain         | Accession Number | Genotype  |
|--------------------------|----------------|------------------|-----------|
| GROUP A                  | Long           | M17212           | Prototype |
|                          | A2             | M11486           | Prototype |
|                          | AL19471-5      | AF233902         | GA1       |
|                          | MO48           | AF233914         | GA1       |
|                          | NY108          | AF233917         | GA1       |
|                          | Kerman/A/07/57 | GU339399         | GA1       |
|                          | Tehran/A/09/57 | HM063452         | GA1       |
|                          | TX69564        | AF233923         | GA2       |
|                          | SAL/87/99      | AY472086         | GA2       |
|                          | MO16           | AF233913         | GA3       |
|                          | TX68481        | AF233920         | GA3       |
|                          | CH09           | AF065254         | GA4       |
|                          | MO01           | AF233909         | GA5       |
|                          | NY103          | AF233916         | GA5       |
|                          | TX67951        | AF233919         | GA5       |
|                          | ARG22516-97    | AY910841         | GA5       |
|                          | SAL/173/99     | AY472094         | GA5       |
|                          | RP111-05       | EU635820         | GA5       |
|                          | AL19452-2      | AF233901         | GA6       |
|                          | NY20           | AF233918         | GA6       |
|                          | CN2851         | AF233907         | GA7       |
|                          | CN1973         | AF233904         | GA7       |
|                          | SAL/82/99      | AY472093         | GA7       |
|                          | NG01604        | AB470478         | NA1       |
|                          | NG08205        | AB470479         | NA2       |
|                          | RP221-05       | EU635828         | NA2       |
|                          | BR266-05       | EU582161         | NA2       |
|                          | BR292-05       | EU582162         | NA2       |
|                          | SA98V603       | AF348807         | SAA1      |
|                          | SA99V1239      | AF348808         | SAA1      |
|                          | ON138-0111A    | JN257694         | ON1       |
|                          | ON67-1210A     | JN257693         | ON1       |
| GROUP B                  | Sw8/60         | M55633           | Prototype |
|                          | WV15291        | M73542           | GB1       |
|                          | CH10b          | AF065250         | GB1       |
|                          | WV4843         | M73540           | GB1       |
|                          | LZY83          | GU357513         | GB2       |
|                          | LZY148         | GU357522         | GB2       |

|  |            |          |        |
|--|------------|----------|--------|
|  | AL19794-1  | AF233925 | GB3    |
|  | MO35       | AF233929 | GB3    |
|  | SA98V602   | AF348824 | GB4    |
|  | MO30       | AF233928 | GB4    |
|  | NY01       | AF233931 | GB4    |
|  | V0041KS01  | AY226535 | SAB1   |
|  | G19S01     | AY226522 | SAB1   |
|  | SA99V1325  | AF348822 | SAB2   |
|  | SA99V800   | AF348821 | SAB2   |
|  | V2004KS01  | AY226536 | SAB3   |
|  | 0112KS01   | AY226526 | SAB3   |
|  | BA/733/02  | DQ227374 | BA-I   |
|  | BA/166/02  | DQ227368 | BA-I   |
|  | BA/4826/03 | DQ227389 | BA-II  |
|  | BA/5140/03 | DQ227393 | BA-II  |
|  | BA/1441/02 | DQ227381 | BA-III |
|  | BA/354/04  | DQ227406 | BA-IV  |
|  | BA/100/04  | DQ227395 | BA-IV  |
|  | RP040/05   | EU635852 | BA-IV  |
|  | RP108/05   | EU635861 | BA-IV  |
|  | BR1602     | HM021225 | BA-IV  |
|  | NG-004-03  | AB175819 | BA-V   |
|  | NG-006-03  | AB175820 | BA-V   |
|  | BE/46/03   | AY751110 | BA-VI  |

**Supplementary Figure 1. a)** Phylogenetic tree of SJRP HRSV nucleotide sequences from the second variable region of the G gene.**b)** Phylogenetic tree of SJRP HRSV deduced amino acid sequences from the second variable region of the G gene Multiple sequences alignment and phylogenetic tree was constructed using Clustal W and Maximum Likelihood method running within MEGA 5.05 software. Tree topology was supported by bootstrap analysis with 1000 pseudo replicate datasets. Bootstrap values greater than 50 are shown at the branch nodes.

**a**

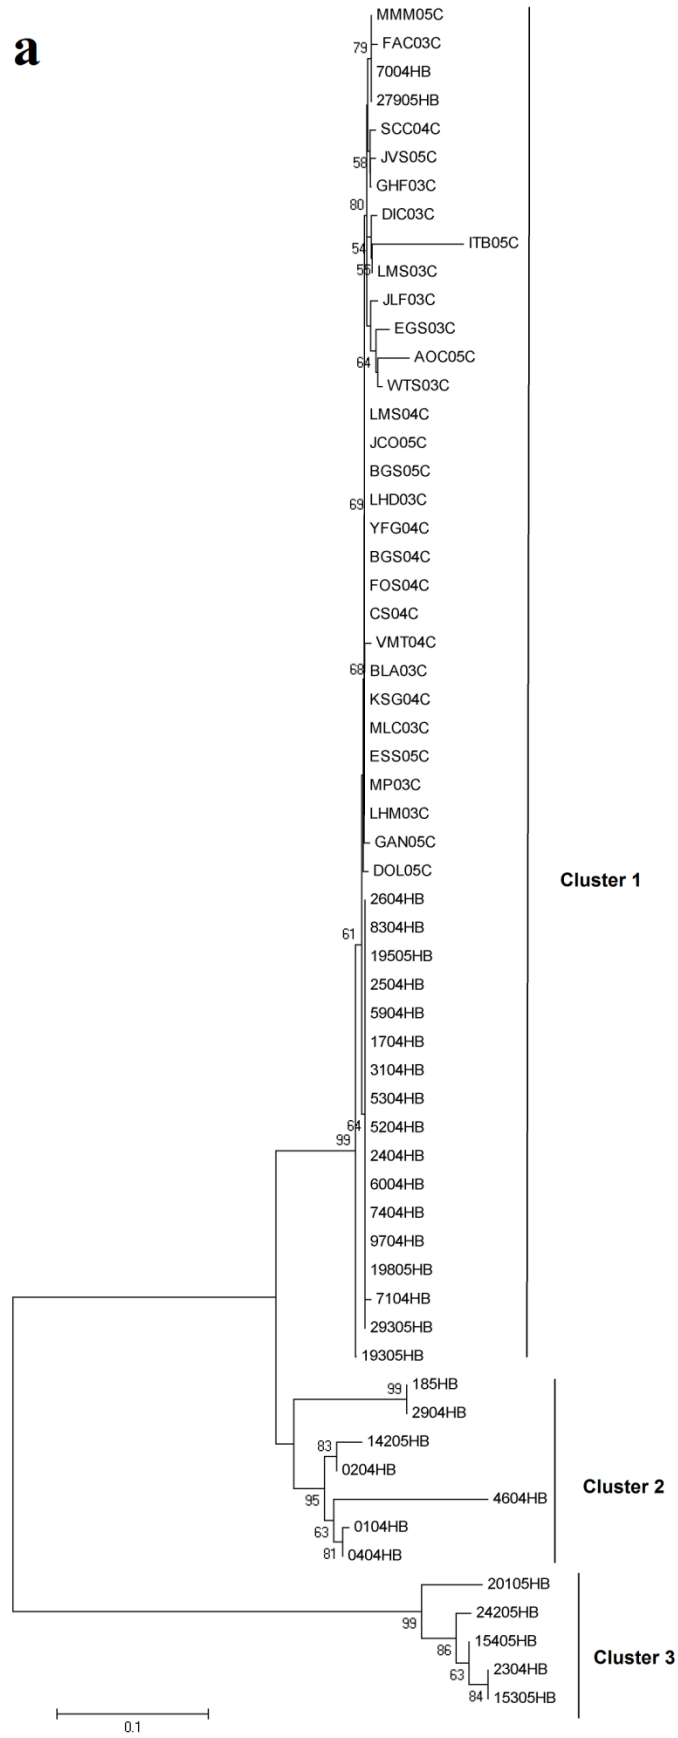

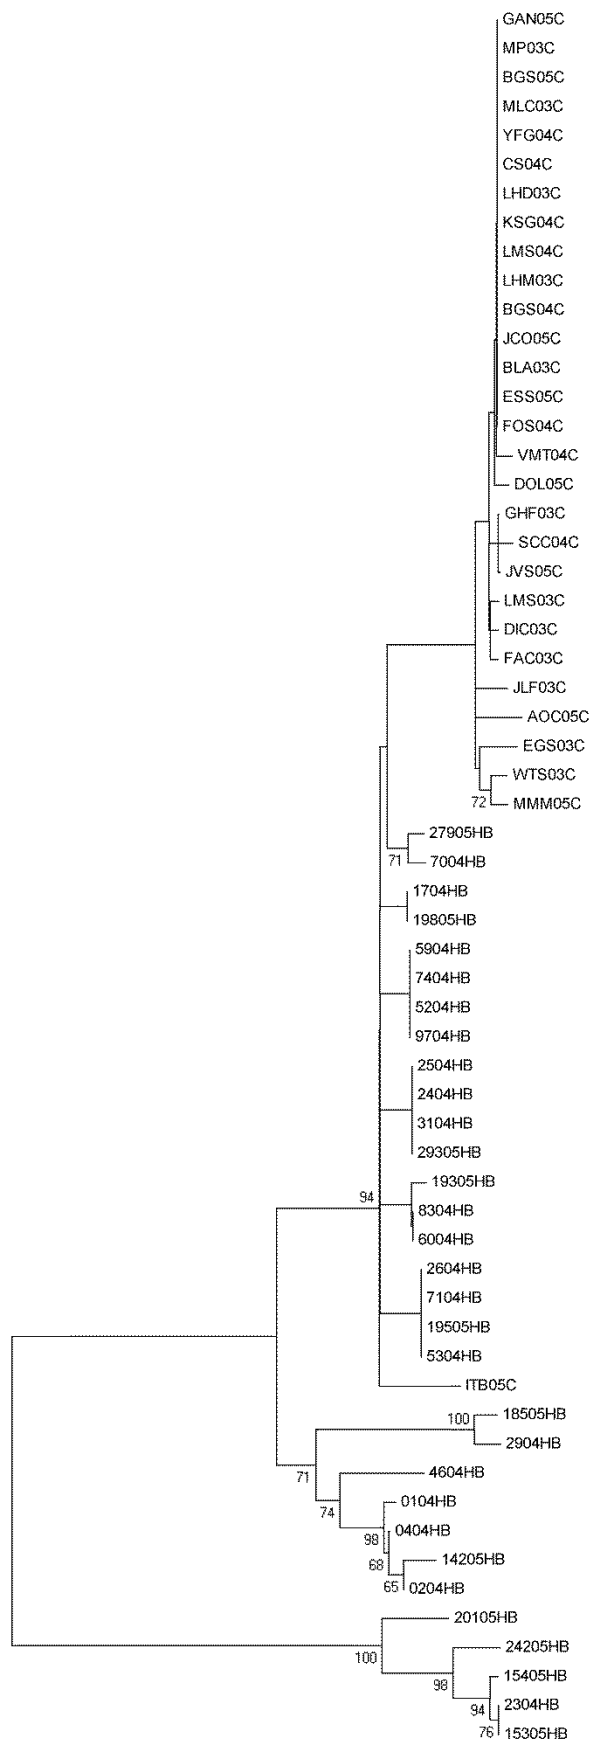

0.01

810 820 830 840 850 860 870 880 890

A2 AACTTCTCCGAAGGCAATCCAAAGCCCTTCTCAAGTCTCTACAACATCCGAGTACCCATCACAACCTTCATCTCCA-CCCAACACACCACGCGCAGTAG

2604HB  
8304HB  
19505HB  
7104HB  
2504HB  
5904HB  
19305HB  
1704HB  
3104HB  
5304HB  
5204HB  
2404HB  
6004HB  
7404HB  
9704HB  
19805HB  
29305HB  
27905HB  
7004HB

ITB05C  
AOC05C  
EGS03C  
JLF03C  
WTS03C  
MMM05C  
DIC03C  
FAC03C  
VMT04C  
LHD03C  
LMS03C  
DOL05C  
GAN05C  
KSG04C  
YFG04C  
BGS05C  
MLC03C  
BGS04C  
JCO05C  
ESS05C  
FOS04C  
LMS04C  
MP03C  
CS04C  
LHM03C  
BLA03C  
SCC04C  
JVS05C  
GHF03C

HOSPITAL

DAY CARE CENTER

**DAY CARE CENTER**
